RESEARCH ARTICLE

# Livestock First Reached Southern Africa in Two Separate Events

Karim Sadr\*

School of Geography, Archaeology and Environmental Studies, University of the Witwatersrand, Johannesburg, South Africa

\* [karim.sadr@wits.ac.za](mailto:karim.sadr@wits.ac.za)

## Abstract

After several decades of research on the subject, we now know when the first livestock reached southern Africa but the question of how they got there remains a contentious topic. Debate centres on whether they were brought with a large migration of Khoe-speakers who originated from East Africa; or whether the livestock were traded down-the-line among hunter-gatherer communities; or indeed whether there was a long history of diverse small scale population movements in this part of the world, one or more of which ‘infiltrated’ livestock into southern Africa. A new analysis of the distribution of stone toolkits from a sizeable sample of sub-equatorial African Later Stone Age sites, coupled with existing knowledge of the distribution of the earliest livestock remains and ceramics vessels, has allowed us to isolate two separate infiltration events that brought the first livestock into southern Africa just over 2000 years ago; one infiltration was along the Atlantic seaboard and another entered the middle reaches of the Limpopo River Basin. These findings agree well with the latest results of genetic research which together indicate that multiple, small-scale infiltrations probably were responsible for bringing the first livestock into southern Africa.

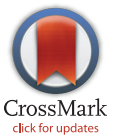

## OPEN ACCESS

**Citation:** Sadr K (2015) Livestock First Reached Southern Africa in Two Separate Events. PLoS ONE 10(8): e0134215. doi:10.1371/journal.pone.0134215

**Editor:** Nuno Bicho, Universidade do Algarve, PORTUGAL

**Received:** June 20, 2015

**Accepted:** July 6, 2015

**Published:** August 21, 2015

**Copyright:** © 2015 Karim Sadr. This is an open access article distributed under the terms of the [Creative Commons Attribution License](https://creativecommons.org/licenses/by/4.0/), which permits unrestricted use, distribution, and reproduction in any medium, provided the original author and source are credited.

**Data Availability Statement:** The data are all contained within the paper and have been obtained from the sources listed in [Table 2](#).

**Funding:** The authors have no support or funding to report.

**Competing Interests:** The authors have declared that no competing interests exist.

## Introduction

The first European explorers and settlers on the west and south coasts of southern Africa obtained sheep and cattle from people who spoke a Khoe language, and for long we assumed that the Khoe-speakers had originally migrated into southern Africa *en masse* bringing the first livestock with them [1–3]. With direct radiocarbon dating of ancient livestock bones from several archaeological sites ([Table 1](#)), we are now certain that the earliest sheep and cattle appeared in southern Africa around 2000 years ago [4–8]. Since these livestock could not have been domesticated locally (their wild ancestors never lived in the southern hemisphere), researchers agree that they must have come from farther north, and different routes and chronologies have been proposed [2, 9–11]. But the question of how and in whose company livestock arrived has in the last two decades become a contentious topic. Did the animals indeed reach southernmost Africa with a sizeable migration of Khoe-speaking pastoralists [12–14]? Or were they traded down-the-line from one community to its neighbours, reaching the southern tip of Africa without accompanying herders [15–21]? Or indeed did one or more small-scale infiltrations of

**Table 1. The earliest directly dated livestock remains in southern Africa.** Table arranged in chronological order from oldest to youngest dates.

| Basin             | Site         | Lab No       | Date BP | Sigma | Cal* 2 sigma | Comment                                    | Reference |
|-------------------|--------------|--------------|---------|-------|--------------|--------------------------------------------|-----------|
| Namibian Coastal  | Leopard Cave | Beta_270164  | 2270    | 40    | 390–170 BC   | AMS date on <i>Ovis aries</i> (sheep) bone | [5]       |
| Namibian Coastal  | Leopard Cave | Beta-270163  | 2190    | 40    | 360–40 BC    | AMS date on <i>Ovis aries</i> (sheep) bone | [5]       |
| Western Coastal   | Spoegrivier  | OxA-3862     | 2105    | 65    | 350 BC-AD 90 | AMS date on <i>Ovis aries</i> (sheep) bone | [7]       |
| Kalahari Drainage | Toteng 1     | Beta-1904888 | 2070    | 40    | 170 BC-AD 80 | AMS date on <i>Bos taurus</i> (cow) bone   | [6]       |
| Kalahari Drainage | Toteng 1     | Beta-186669  | 2020    | 40    | 60 BC-AD 140 | AMS date on <i>Ovis aries</i> (sheep) bone | [6]       |
| Southern Coastal  | Blombos      | OxA-4543     | 1960    | 50    | 20 BC-AD 240 | AMS date on <i>Ovis aries</i> (sheep) bone | [4]       |

\*Calibrated with Southern Hemisphere Atmospheric data in OxCal v3.10 [31, 32].

doi:10.1371/journal.pone.0134215.t001

herders introduce livestock which subsequently diffused among innovative local foragers who thus became hunter-herders [22–24]? Related questions have been asked by linguists and geneticists about the role of Khoe-speakers in the original spread of livestock to southern Africa and whether the Khoe-speakers originally came from East Africa [25–30].

Importantly, it had been noted long ago that although innovations such as livestock and ceramic vessels appeared suddenly in the southern African landscape, stone tool (also known as lithic) sequences remained unchanged [15]. Indeed, for the most part they did remain unchanged; but at a few more recently excavated key sites there were significant changes in stone toolkits that shed new light on the question of how the first livestock arrived in southern Africa. In this paper, a new analysis of the distribution of key stone tool types, ceramic styles and early livestock remains in well-dated Later Stone Age sites of Africa south of the -10<sup>th</sup> parallel shows that around 2000 years ago sheep and cattle were first infiltrated into southern Africa by small groups of hunter-herders on two separate fronts. In the extreme west, sheep were infiltrated southwards along the Atlantic seaboard and as far as the southern tip of Africa by hunter-herders carrying a northern stone toolkit. Contemporary with this event, sheep and cattle as well as the art of pottery entered the middle Limpopo River Basin with a smaller infiltration of northern hunter-herders who crossed the watershed from the Zambezi River Basin (Fig 1). Rapidly, these innovations diffused among the Limpopo River Basin foragers, and then crossed the watershed westwards into the Kalahari Drainage Basin, this time with hunter-herders of the Limpopo River Basin lithic tradition who moved along the Makgadikgadi Pans and up the Boteti River Valley as far as Lake Ngami. A few centuries later Limpopo River Basin hunter-herders were responsible for the further spread of livestock southwards but we will leave the detailed discussion of that mid-first millennium AD event for a future paper.

The dispersion of new ideas, practices and products is a motor of societal change [33]. The important and measureable variables in such a dispersion are the time taken to adopt an innovation, the number of adopters at a given time, whether individuals or groups, and the channels through which innovations spread, as well as the types and numbers of boundaries which the innovation crossed [34]. Depending on a host of factors such as relative advantage, compatibility, complexity, trial-ability and observability, the innovation’s rate of adoption will vary [35], but not all of these factors are easily observed in our relatively coarse-grained archaeological data. When crossing boundaries, the diffusion of innovation becomes archaeologically more easily visible and a mosaic of mechanisms was identified by Zvelebil and Lillie [36] in the spread of farming into Europe. Some of these can also be observed in ancient southern Africa. They include well known mechanisms such as demic diffusion, which is the sequential colonization by random migration carried out by family groups over many generations, with daughter settlements budding off from the parental ones. An excellent example of demic diffusion is the Bantu-speakers’ migrations into and within southern Africa [37–44]. Leapfrog colonization

**Table 2. Our current data base of the sub-equatorial African LSA sites and components.**

| Basin_Site ID | SITE                 | layers       | phase | SCRAPER% | BACKED% | FT   | CAL DATES         | References       |
|---------------|----------------------|--------------|-------|----------|---------|------|-------------------|------------------|
| E_7           | BONAWE               | 1 a+b        | 3     | 100.0    | 0.0     | 24   | 400–40 BC         | [75]             |
| E_7           | BONAWE               | 2            | 2     | 96.2     | 3.8     | 211  | 1090–800 BC       | [75]             |
| E_17          | BORCHERS             | 3            | 2     | 50.0     | 28.6    | 196  | 1900 BC-AD 90     | [76]             |
| E_1           | CLARKE'S             | 2            | 3     | 61.7     | 5.8     | 120  | 420–640 AD        | [77]             |
| E_1           | CLARKE'S             | 3            | 2     | 54.5     | 3.6     | 55   | 750 BC-AD 20      | [77]             |
| E_2           | COLLINGHAM           | bsv3         | 3     | 31.0     | 12.1    | 58   | 70–340 AD         | [78]             |
| E_8           | DIAMOND              | 1            | 2     | 66.4     | 11.8    | 110  | 1050–790 BC       | [77]             |
| E_12          | DRIEL                | older ash    | 3     | 58.3     | 0.9     | 108  | 220–430 AD        | [79]             |
| E_9           | GEHLE                | 1            | 3     | 64.3     | 19.0    | 126  | 670–1390 AD       | [80]             |
| E_9           | GEHLE                | 2            | 2     | 63.3     | 24.1    | 158  | 3090–2660 BC      | [80]             |
| E_6           | INKOLIMASHI          | 4 & 5        | 3     | 35.6     | 6.7     | 45   | 400–1020 AD       | [81]             |
| E_6           | INKOLIMASHI          | 7 & 8        | 2     | 52.0     | 32.0    | 35   | 1600–400 BC       | [81]             |
| E_5           | KWATHWALEYAKHE       | 2            | 3     | 42.7     | 25.9    | 232  | 660–990 AD        | [82]             |
| E_5           | KWATHWALEYAKHE       | 4            | 2     | 39.2     | 15.5    | 181  | 900–510 BC        | [82]             |
| E_14          | MAQONQO              | 2            | 2     | 48.5     | 21.4    | 103  | 2020–1660 BC      | [83]             |
| E_3           | MBABANE              | 4            | 3     | 54.6     | 19.0    | 163  | 430–890 AD        | [84]             |
| E_10          | MGEDE                | 3            | 2     | 64.9     | 4.1     | 74   | 3350–2700 BC      | [85]             |
| E_4           | MHLWAZINI            | 5_6          | 2     | 58.0     | 9.1     | 231  | 980–160 BC        | [86]             |
| E_15          | MZINYASHANA          | 4            | 3     | 63.8     | 2.6     | 116  | 220–540 AD        | [87]             |
| E_15          | MZINYASHANA          | 6            | 2     | 41.0     | 5.1     | 39   | 400–110 BC        | [87]             |
| E_11          | NKUPE                | 3            | 2     | 13.1     | 2.0     | 343  | 1540–390 BC       | [88]             |
| E_13          | SIKHANYISWENI        | 2            | 2     | 25.7     | 17.8    | 202  | 2460–2030 BC      | [89]             |
| E_16          | UMBELI BELLI         | 2AL          | 3     | 55.1     | 14.3    | 49   | 810–1040 AD       | [76]             |
| K_5           | MAHOPA               | 10_16        | 2     | 13.0     | 45.7    | 46   | 1690 BC-AD 240    | [90]             |
| K_7           | TOTENG               | 40_140       | 3     | 40.0     | 32.5    | 40   | 170 BC-AD 670     | [91]             |
| K_7           | TOTENG               | 140_200      | 2     | 15.2     | 81.8    | 33   | 900–410 BC        | [91]             |
| K_9           | XAIXAI               | 9_18         | 3     | 7.2      | 59.8    | 97   | 400 BC-AD 530     | [90]             |
| K_9           | XAIXAI               | 19_27        | 2     | 8.8      | 61.9    | 113  | 2300–1190 BC      | [90]             |
| L_2           | BALERNO              | dbg60-65_bra | 3     | 71.5     | 10.0    | 1031 | 650–1160 AD       | [92]             |
| L_2           | BALERNO              | dbg >65      | 2     | 64.6     | 22.5    | 178  | 360–20 BC         | [92]             |
| L_1           | BAMBATA              | 3a,b         | 3     | 33.9     | 40.2    | 174  | 360–60 AD         | [93, 94]         |
| L_1           | BAMBATA              | 3c           | 2     | 37.6     | 44.4    | 117  | 2570–2200 BC      | [93, 94]         |
| L_4           | JUBILEE              | lyn-lyn4     | 2     | 51.6     | 22.8    | 184  | 1630–1310 BC      | [95]             |
| L_4           | JUBILEE              | b-cash       | 3     | 90.1     | 5.2     | 252  | 120–390 AD        | [95]             |
| L_7           | MPHEKWANE            | 1_4          | 3     | 30.3     | 13.3    | 399  | 890–1160 AD       | Sadr unpublished |
| L_7           | MPHEKWANE            | 42102        | 2     | 23.2     | 10.8    | 203  | 800–200 BC        | Sadr unpublished |
| L_9           | OLIEBOOMSPOORT       | 1_5          | 3     | 86.1     | 7.2     | 746  | 250–880 AD        | [96]             |
| L_9           | OLIEBOOMSPOORT       | 5_10         | 2     | 72.6     | 7.9     | 2388 | 420 BC-AD 70      | [96]             |
| L_11          | RADIEPOLONG          | 1.16_27      | 2     | 61.8     | 14.7    | 34   | 1370–1000 BC      | Sadr unpublished |
| L_12          | THAMAGA              | 0–40         | 3     | 38.6     | 8.0     | 88   | 670–1050 AD       | [97]             |
| L_12          | THAMAGA              | 40_60        | 2     | 38.0     | 33.8    | 71   | 3550–2750 BC      | [97]             |
| L_13          | TSHISIKU             | 4_14         | 2     | 51.8     | 42.6    | 740  | 1500–910 BC       | [98]             |
| L_14          | TULI LODGE           | def          | 3     | 40.8     | 43.3    | 245  | 890–1030 AD       | [99, 100]        |
| N_19          | AFFENFELSEN          | complex a    | 2     | 29.4     | 55.6    | 870  | 1880–1530 BC      | [101]            |
| N_16          | AUSTERLITZ           | complex c    | 3     | 37.7     | 30.2    | 53   | 1–1000 AD est.    | [101]            |
| N_16          | AUSTERLITZ           | complex d    | 2     | 32.3     | 40.3    | 124  | 4500–1200 BC est. | [101]            |
| N_23          | BIG ELEPHANT SHELTER | pottery      | 3     | 40.8     | 21.7    | 120  | 550–1150 AD       | [102]            |

(Continued)

Table 2. (Continued)

| Basin_Site ID | SITE                 | layers      | phase | SCRAPER% | BACKED% | FT   | CAL DATES         | References       |
|---------------|----------------------|-------------|-------|----------|---------|------|-------------------|------------------|
| N_23          | BIG ELEPHANT SHELTER | pre-pottery | 2     | 51.8     | 29.4    | 197  | 1440–410 BC       | [102]            |
| N_15          | EEMBA 14             | complex c   | 3     | 30.6     | 48.4    | 62   | 360 BC-AD 60 est. | [101]            |
| N_18          | EEMBA 2              | complex b   | 3     | 35.1     | 19.3    | 57   | 10–260 AD         | [101]            |
| N_14          | FACKELTRAEGER        | complex b   | 3     | 43.5     | 34.8    | 46   | 360 BC-AD 60      | [101]            |
| N_14          | FACKELTRAEGER        | complex d1  | 2     | 37.7     | 32.1    | 53   | 1260–810 BC       | [101]            |
| N_2           | FALLS ROCK SHELTER   | 5_9         | 3     | 49.3     | 50.7    | 67   | 200 BC-AD 340     | [18]             |
| N_2           | FALLS ROCK SHELTER   | 1_4         | 2     | 33.8     | 66.2    | 68   | 3350–1450 BC      | [18]             |
| N_3           | GEDULD               | 1_7         | 3     | 5.2      | 84.5    | 58   | 40 BC-AD 1380     | [103]            |
| N_22          | HASENBILD            | complex a   | 2     | 35.6     | 55.7    | 219  | 4500–1200 BC est. | [101]            |
| N_17          | MESSUM 1             | complex b   | 3     | 17.4     | 39.1    | 23   | 630–870 AD        | [101]            |
| N_17          | MESSUM 1             | complex c   | 2     | 20.5     | 55.5    | 146  | 180 BC-AD 250     | [101]            |
| N_21          | MESSUM 2             | complex a   | 2     | 29.9     | 52.9    | 87   | 4500–1200 BC est. | [101]            |
| N_13          | N2000/2              | all         | 3     | 19.4     | 77.4    | 31   | 120–350 AD        | [104]            |
| N_12          | OMUNGUNDA 99/1       | early cer   | 3     | 7.7      | 79.5    | 39   | 20–220 AD         | [104]            |
| N_12          | OMUNGUNDA 99/1       | micr lsa 1  | 2     | 13.8     | 51.7    | 29   | 410–170 BC        | [104]            |
| N_8           | ORUWANJE 95/1        | early cer   | 3     | 14.8     | 55.6    | 54   | 360 BC-AD 320     | [104]            |
| N_8           | ORUWANJE 95/1        | micr lsa 1  | 2     | 22.7     | 29.5    | 44   | 1220–410 BC       | [104]            |
| N_10          | SNAKE ROCK SHELTER   | 3_5         | 2     | 52.6     | 47.4    | 38   | 3350–410 BC       | [18]             |
| N_24          | STRIPED GIRAFFE      | pre-pottery | 2     | 55.7     | 27.1    | 70   | 4790–950 BC       | [102]            |
| O_26          | BLOUBOS              | all         | 3     | 70.5     | 29.5    | 332  | 130–400 AD        | [105]            |
| O_5           | BLYDEFONTEIN         | iii-iv      | 2     | 29.2     | 39.3    | 178  | 250 BC-AD 400     | [106]            |
| O_28          | COLWINTON            | 3           | 3     | 86.1     | 1.6     | 445  | 60–330 AD         | [75]             |
| O_6           | DIKBOSH              | 1,2         | 2     | 55.7     | 41.1    | 192  | 1440–1080 BC      | [107]            |
| O_6           | DIKBOSH              | 1 to 3      | 3     | 69.3     | 15.8    | 101  | 250–650 AD        | [107]            |
| O_29          | HOLKRANS             | 5_9         | 3     | 56.8     | 8.1     | 37   | 130–390 AD        | Sadr unpublished |
| O_9           | JAGTPAN7             | 3 and 4     | 2     | 26.1     | 47.8    | 23   | 790–410 BC        | [108]            |
| O_21          | LIKOAENG             | ii_ix       | 2     | 69.1     | 10.9    | 304  | 360 BC-AD 340     | [109]            |
| O_10          | LIMEROCK             | all         | 3     | 75.0     | 6.5     | 108  | 250–780 AD        | [107]            |
| O_19          | MASITISE             | 3b          | 2     | 38.2     | 30.6    | 157  | 1870–1420 BC      | [110]            |
| O_27          | RAVENS CRAIG         | 2           | 2     | 81.3     | 2.8     | 107  | 1390–1050 BC      | [75]             |
| O_12          | RIVERSMEAD           | i-iv        | 3     | 36.0     | 31.5    | 686  | 750 BC-AD 50      | [111]            |
| O_12          | RIVERSMEAD           | v-ix        | 2     | 45.3     | 20.8    | 298  | 910–370 BC        | [111]            |
| O_24          | ROSE COTTAGE         | a2          | 2     | 62.7     | 12.3    | 826  | 390–50 BC         | [112]            |
| O_23          | SEHONGHONG           | gap         | 3     | 80.6     | 3.2     | 62   | 260–980 AD        | [113]            |
| O_15          | WITKRANS             | 0_30        | 3     | 82.4     | 15.0    | 187  | 540–670 AD        | [107]            |
| S_1           | BOOMPLAAS            | BLD         | 3     | 76.6     | 2.6     | 231  | 50 BC-AD 260      | [114]            |
| S_9           | BYNESKRANSKOP        | 2           | 2     | 33.3     | 7.4     | 108  | 1780–1490 BC      | [115]            |
| S_10          | DIE KELDERS          | 6_12        | 3     | 8.9      | 58.9    | 56   | 250 BC-AD 350     | [116]            |
| S_2           | HAVENS               | bed + pos   | 3     | 79.2     | 0.0     | 24   | 670–940 AD        | [117]            |
| S_2           | HAVENS               | oga         | 2     | 90.6     | 3.1     | 32   | 2000–1 BC est.    | [117]            |
| S_7           | HIGHLANDS            | iii         | 2     | 49.3     | 39.4    | 71   | 1980–1690 BC      | [118]            |
| S_3           | KABELJOUS            | kbl units   | 2     | 12.8     | 5.1     | 39   | 770–380 BC        | [119]            |
| S_6           | MELKHOUTBOOM         | caf         | 2     | 66.7     | 7.1     | 99   | 1260–800 BC       | [118]            |
| S_8           | WILTON               | 2b          | 2     | 71.9     | 15.6    | 32   | 550 BC-AD 50      | [120]            |
| W_10          | DEFLATION HOLLOW     | 24 sites    | 2     | 47.8     | 19.2    | 8030 | 3000–1500 BC est. | [121]            |
| W_21          | FARAOSKOP            | 2           | 2     | 49.1     | 3.6     | 55   | 3330 BC-AD 240    | [122]            |
| W_16          | KASTEELBERG A        | all         | 3     | 10.0     | 0.0     | 20   | 70–1400 AD        | [123]            |

(Continued)

Table 2. (Continued)

| Basin_Site ID | SITE             | layers      | phase | SCRAPER% | BACKED% | FT   | CAL DATES      | References       |
|---------------|------------------|-------------|-------|----------|---------|------|----------------|------------------|
| W_5           | KASTEELBERG B    | 12_16       | 3     | 19.0     | 0.0     | 21   | 660–1140 AD    | [123]            |
| W_6           | KASTEELBERG C    | bot         | 3     | 32.0     | 49.5    | 97   | 360 BC-AD 20   | [123]            |
| W_7           | KASTEELBERG G    | 1_21        | 3     | 44.2     | 15.6    | 77   | 390 BC-AD 1180 | Sadr unpublished |
| W_7           | KASTEELBERG G    | 22_42       | 2     | 44.0     | 24.0    | 50   | 2940–1730 BC   | Sadr unpublished |
| W_27          | KN6-3C           | upper       | 2     | 23.2     | 45.7    | 138  | 1890–1490 BC   | [124]            |
| W_25          | MS3              | all         | 2     | 9.1      | 81.8    | 22   | 1210–820 BC    | [125]            |
| W_8           | PANCHOS          | 3_7         | 2     | 66.7     | 8.8     | 57   | 2030–510 BC    | [126]            |
| W_23          | PN2009/001       | all         | 2     | 72.0     | 15.9    | 107  | 520–340 BC     | [125]            |
| W_20          | RENBAAN          | AD          | 3     | 38.9     | 2.8     | 36   | 20–340 AD      | [127]            |
| W_24          | SK2001/025       | area f      | 3     | 48.1     | 25.9    | 27   | 80 BC-AD 100   | [125]            |
| W_24          | SK2001/025       | a-d         | 2     | 70.0     | 15.0    | 40   | 560–40 BC      | [125]            |
| W_11          | SPOEGRIVIER CAVE | 1_5         | 3     | 0.0      | 70.0    | 20   | 10–970 AD      | [128]            |
| W_11          | SPOEGRIVIER CAVE | 6_16        | 2     | 33.0     | 33.0    | 94   | 2030–1630 BC   | [128]            |
| W_12          | STEENBOKFONTEIN  | 1_3         | 2     | 51.0     | 6.7     | 104  | 930–40 BC      | [129]            |
| W_13          | TORTOISE CAVE    | 4_9         | 2     | 53.9     | 16.9    | 154  | 2700–1620 BC   | [130]            |
| W_19          | VP SURVEY        | 18 sites    | 3     | 21.3     | 4.3     | 47   | 60–999 AD      | [131]            |
| W_19          | VP SURVEY        | 13 sites    | 2     | 35.7     | 8.7     | 126  | 1729–44 BC     | [131]            |
| W_15          | WITKLIP          | 3           | 3     | 22.6     | 14.3    | 84   | 80–820 AD      | [132]            |
| W_15          | WITKLIP          | 4           | 2     | 48.6     | 18.9    | 37   | 1410–1050 BC   | [132]            |
| Z_1           | CHAMINADE        | ch3-ct      | 2     | 10.2     | 88.9    | 108  | 1870–1490 BC   | [133]            |
| Z_14          | KANDANDA         | 4           | 2     | 60.0     | 12.0    | 50   | 2300–1250 BC   | [134]            |
| Z_3           | LEOPARDS HILL    | 30–50       | 2     | 36.5     | 55.3    | 85   | 1960–800 BC    | [51]             |
| Z_5           | MAKWE            | 6_4         | 3     | 1.7      | 98.1    | 1342 | 50–1230 AD     | [135]            |
| Z_5           | MAKWE            | 3_1         | 2     | 4.9      | 95.0    | 903  | 3970–2550 BC   | [135]            |
| Z_6           | MUFULWE          | iii         | 3     | 12.5     | 67.3    | 104  | 260–540 AD     | [136]            |
| Z_9           | NACHIKUFU CAVE   | brown earth | 2     | 17.4     | 70.4    | 1240 | 5700–2600 BC   | [51]             |
| Z_8           | NAKAPAPULA       | 3           | 3     | 26.4     | 37.5    | 72   | 670–1140 AD    | [137]            |
| Z_8           | NAKAPAPULA       | 5           | 2     | 20.8     | 43.8    | 48   | 1740–1290 BC   | [137]            |
| Z_7           | THANDWE          | 1_6         | 3     | 2.1      | 97.9    | 282  | 770–1390 AD    | [135]            |

Table arranged in alphabetic order of basin (initial letter) and then site name.

doi:10.1371/journal.pone.0134215.t002

by seafaring communities was important in the spread of farming across the Mediterranean Sea [45], but is perhaps less relevant in the early spread of farming and herding in southern Africa. Central to our study is the mechanism of infiltration, which refers to the gradual penetration of an area by small groups who entered subordinate positions in society, while ‘elite dominance’ is a similar mechanism but refers to an infiltrating minority that seized control. In Zvelebil and Lillie’s scheme, folk migration is the directional movement of a population from the old area of settlement to the new. Perhaps in part the spread of Bantu-speakers was by folk migration, but the first farmers in the Aegean islands provide a clearer archaeological example of this mechanism [46]. Finally, individual frontier mobility describes a mechanism in which individuals linked by friendship, partnership or kinship move between different communities across economic or cultural boundaries. William Barnett [47] proposed that this mechanism explains the spread of agriculture into the Mediterranean hinterland. Cultural practices such as exogamy and *Hxaro* gift exchange in the recent Kalahari [48] provided ample opportunities for such individual mobility across territories.

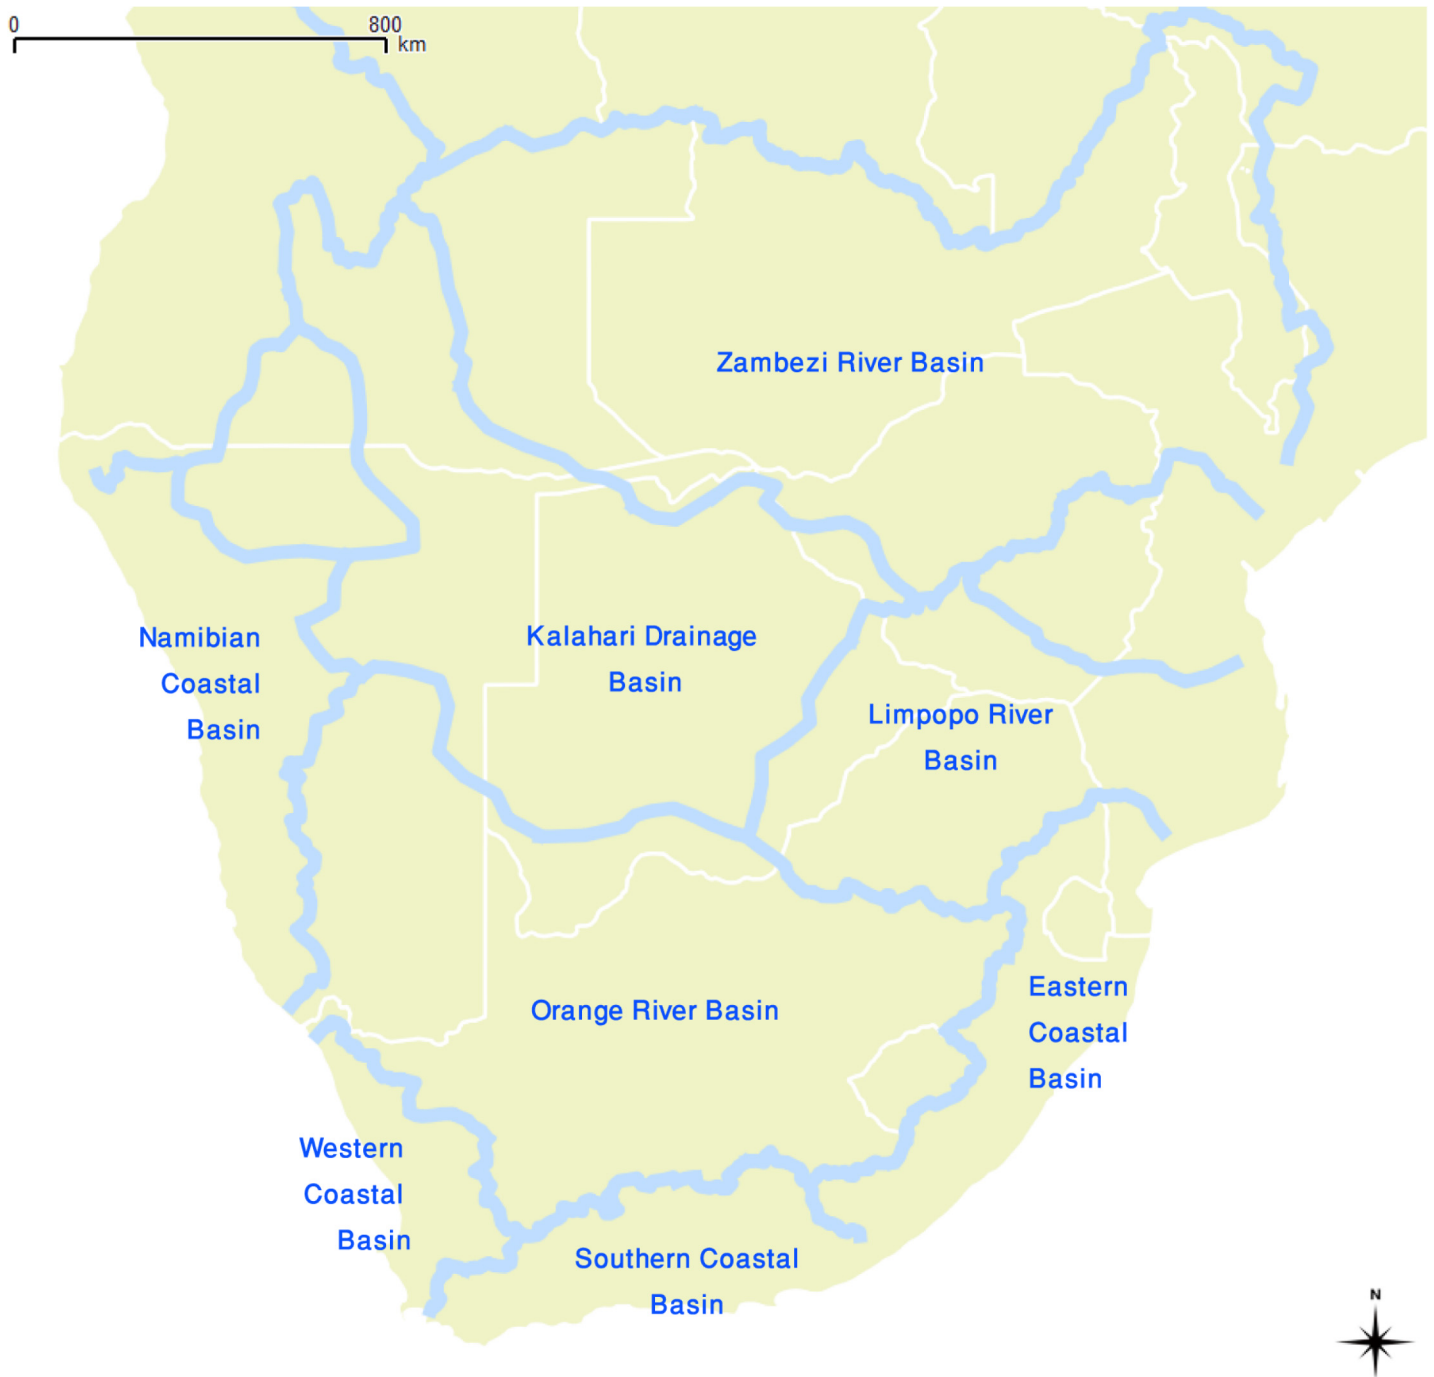

**Fig 1. Map of sub-equatorial Africa.** Country boundaries are shown within white lines and the major watersheds are shown with thick blue lines.

doi:10.1371/journal.pone.0134215.g001

At the sub-continental scale of our study, demic diffusion and infiltration are important mechanisms for the diffusion of innovations. At the smaller sub-regional scales, however, individual mobility probably was a more important mechanism. Indeed all three of these mechanisms simultaneously can be active in the spread of innovations: Infiltration can form a bow wave ahead of demic diffusion, and individual frontier mobility can diffuse innovation ahead

of the infiltrators. The boundaries between these three mechanisms can be vague and arbitrary. One can imagine them as ill-defined regions on a scalar continuum of diffusion of innovation with, at one extreme, innovations diffusing with the agency of many accompanying people (demic diffusion and folk migration), and at the other extreme no significant population displacement being involved in the diffusion of new traits (individual frontier mobility). In the grey middle ground of this continuum, infiltration refers to the diffusion of innovations by small groups of people. How many is many and how small is small? Different researchers would no doubt divide the continuum differently. In sociological and economic studies the spread of innovations can be objectively measured in time, scale and directionality [35]. In due time, archaeology will also be able to quantify, at least relatively, the speed, distance and size of population displacement involved in the spread of the first livestock into southern Africa.

## The Archaeological Data

We divide our region of interest into major drainage basins (Fig 1). Of interest here are the Zambezi River Basin (Z), the Limpopo River Basin (L), the Kalahari Drainage Basin (K), the Namibian Coastal Basin (N), the Orange River Basin (O) and the South African Western (W), Southern (S) and Eastern (E) Coastal Basins. Chronologically, we focus on events that took place around 2000 years ago. The first livestock and ceramic vessels, two innovations which were closely associated, appeared in southern Africa in the last few centuries BC (Table 1 and [49, 50]). Here, we divide our time span of interest in two phases. In the first phase we will look at the archaeological evidence from before the introduction of livestock into southern Africa, say the period from around 4000–2000 years ago; and in the second phase we consider the evidence from after their first introduction, a period from about 2000–1000 years ago although for now we are most interested in events that took place before the mid-first millennium AD.

In this space and time of interest, archaeological research coverage is of variable quality and quantity. We will concentrate on the Later Stone Age (LSA) archaeological sites and ignore the Iron Age sites which mostly post-date our main focus and mostly relate to Bantu-speaking farmers who apparently played no direct role in the earliest spread of livestock and ceramics into southern Africa [21, 49]. Different LSA archaeological entities have been named in the literature and we deal with the Nachikufan industries to the north of the Zambezi River and the Wilton to the south [15, 51–54]. The most recent proposal for southern African stone age terminology reserves Wilton for the period 8000–4000 years ago, and recommends the labels Final Later Stone Age and Ceramic Final Later Stone Age for more recent materials [55]. To simplify matters, we will restrict ourselves to the geographical and chronological terms, namely the major drainage basins and their principal Later Stone Age sites from our phases 1 and 2.

For stone tools we focus on two major classes. Formal stone tools refer to stone flakes which were retouched to re-sharpen an edge and/or to produce a desired and standardized form. The two major classes of formal tools under examination are scrapers (Fig 2C) and backed tools (Fig 2A and 2B). The former were mostly used for scraping animal hides, presumably in the production of leather [56–58]. There are several sub-types and significant size variations in Later Stone Age scrapers [15, 59], but at our scale of study we deal only with the general class of this tool and subsume all variants. Unlike scrapers, backed tools were retouched not primarily to shape and re-sharpen the business end of the tool, but to blunt the opposite (back) edge in order to facilitate hafting or to avoid cutting into the hand that used the tool. In Australia backed stone tools were used for a variety of purposes [60] and it is probable that the same is true for southern African backed tools [61]. As with the general class of scrapers, backed tools contain many sub-types but at our scale of study we are only concerned with the distribution of the general class and subsume almost all variants of backed tools. The exception is a

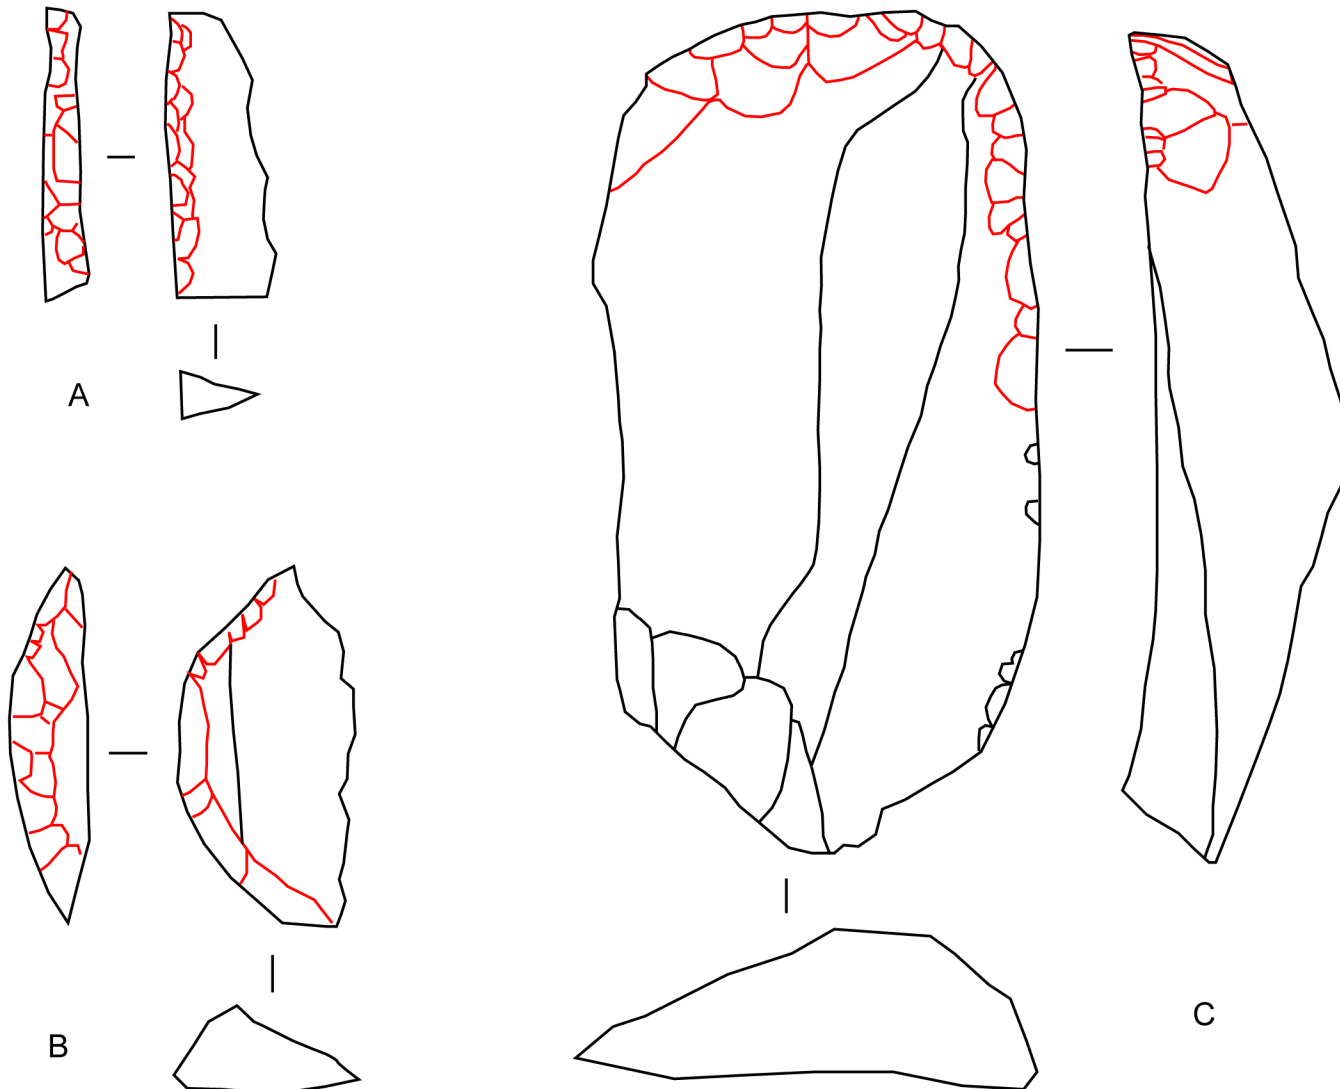

**Fig 2. Illustrations of idealized lithic formal tools.** (A, B) Backed tools. (C) Scraper. Each tool is shown in plan and side view, with a cross section beneath. Retouch scars are outlined in red. Backed tools of the southern African Later Stone Age usually are microlithic, which is to say less than 25 mm in maximum length. Scrapers can be larger but with repeated re-sharpening they become reduced to microlithic stubs before being discarded.

doi:10.1371/journal.pone.0134215.g002

particular tool called a backed scraper. Backed scrapers are relatively rare and have little effect on the results of our analysis regardless of whether we class them with scrapers or backed tools. However, because functionally they are thought to have served as scrapers, we prefer to count them with scrapers and not with backed tools.

It is important to note that scraping, cutting or piercing with stone does not require that the tool be retouched. As ethnographic and experimental studies show [62], freshly flaked stone without further ado will provide pieces with suitable edges for cutting, scraping or piercing, and Later Stone Age people mostly used un-retouched stone tools, sparing themselves the trouble of re-sharpening and/or trimming their stone flakes to a particular shape. At other times and in other places they invested a fair bit of effort into modifying their flaked stones to make them look just so, or they re-sharpened their tools to maximize their use-life. The point is that the modification of a stone flake by retouching is not purely for functional reasons: it is also a



style of doing things and represents a culturally specific practice. We thus assume that the difference in the proportions of types of formal (that is to say retouched) tools is culturally patterned.

It has been known for some time that variations in the distribution of retouched scrapers and backed tools in southern African Later Stone Age sites produce significant chronological and geographic patterns, and several attempts had been made to explain their different distributions in functional terms [15, 52, 63]. Peaks in the proportions of backed tools have sometimes been interpreted as expressions of emerging social relationships, symbols that revealed cultural identities in times of increased formal exchange and gift-giving [64–67]. Others have emphasized that backed tools are portable, standardized and multifunctional tools and in one way or another enhanced efficient resource extraction, helping to offset the risk of uncertain environments [68–71]. Both views could apply in situations of high resource uncertainty, such as might obtain when populations move into new areas. Indeed, in Australia the proliferation of backed tools in certain times and places has been interpreted as a sign of migrations, reflecting risk reduction behaviour among newcomers in less predictable environments and/or where identity had to be clearly marked for new cultural contacts [72–74]. These ideas may also apply to southern Africa.

Our sample for analysis is restricted to Later Stone Age sites located in the drainage basins mentioned above. Site components that are associated with radiocarbon dates from the period between ca. 4000–1000 years ago, and that contain more than 20 formal stone tools are included in this study. A few sites and components that are not directly associated with dates, but whose age can be accurately estimated, have been included in our list. In the literature survey undertaken to date, a total of 123 archaeological site components fit our requirements. Many more Later Stone Age site components have been excavated in these drainage basins, but often they are not absolutely dated, have produced too few formal tools, or their stone tool counts have not been published. Such sites and components may provide supporting arguments but do not contribute to the quantitative analyses and the mapped data. Details of the sites used in our quantitative study are provided in [Table 2](#).

## Results

In phase 1, backed-rich toolkits were dominant in the Zambezi River Basin, the Kalahari Drainage Basin and in the northern part of the Namibian Coastal Basin ([Fig 3](#)). Although relatively few sites from these areas passed the stringent requirements to be included in our analytic data base, the rejected site components (e.g., those not securely dated or with less than 20 formal tools, or incompletely published [104, 135, 138–142]) echo and confirm the general impression that the phase 1 northern assemblages displayed a backed-rich lithic tradition. An anomalous cluster of (infiltrated?) scraper-rich toolkits are confined to the upper reaches of the Zambezi River Basin [134].

Phase 1 scraper-rich toolkits predominate in the Limpopo River Basin, the Orange River Basin as well as the Eastern and Southern Coastal Basins of South Africa. This pattern was also evident in the few thousand years preceding our phase 1 so a scraper-rich toolkit can be seen as a cultural emblem of southern Later Stone Age populations. There are a few interesting exceptions. The southern backed-rich toolkits found in phase 1 of Bambata Cave (Limpopo Basin), Jagt Pan and Blydefontein (Orange Basin) might represent small enclaves of the northern population from early (pre-livestock) infiltrations into the south. In fact, given that the dates from Bambata Cave are close to the phase 2 boundary (see [Table 2](#)), its backed-rich toolkit might actually relate to the introduction of the earliest livestock.

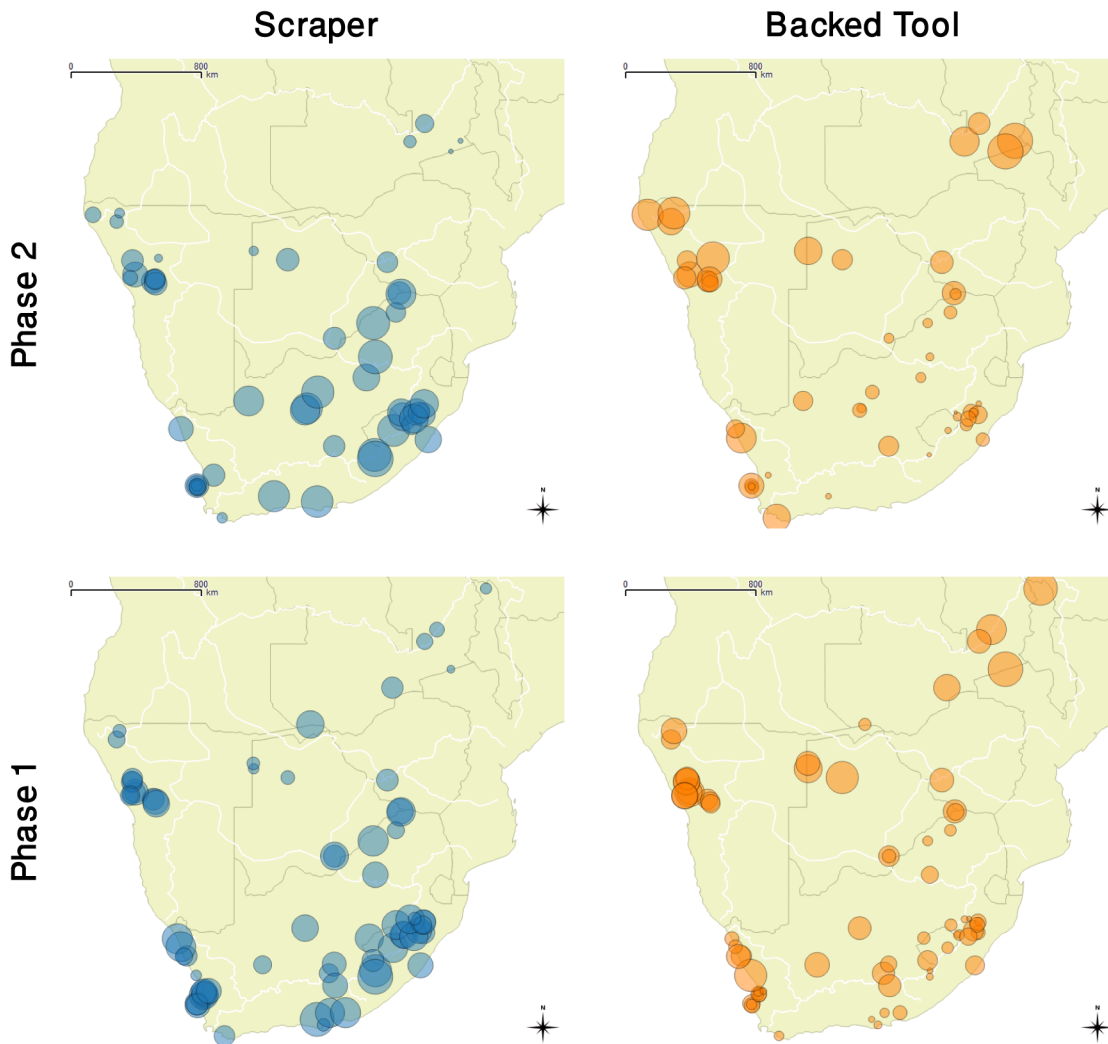

**Fig 3. The distribution of scraper-rich and backed-rich assemblages in phase 1 and phase 2.** The sizes of the circles reflect the percentage of scrapers/backed tools in the assemblage of formal tools at each site. In the background, thin dark lines show national boundaries and the thin white lines indicate the watersheds between basins.

doi:10.1371/journal.pone.0134215.g003

In the central Namibian Coastal Basin, scraper-rich as well as backed-rich assemblages are present, but the two are spatially discrete. As Wadley [102] noted, in Namibia the sites around the Brandberg contain backed-rich toolkits and resemble assemblages from farther north, while 100 km to the south and east, the sites around the Erongo Mountains with their scraper-rich toolkits resemble the southern Wilton assemblages. Unfortunately, none of the published LSA site reports for southern Namibia provide detailed lists of stone tools so they cannot yet be included in our data base. In the Western Coastal Basin of South Africa, only two sites, MS3 and KN6-3C, show a clear dominance of backed tools in phase 1 and they are both located in the northern parts of this basin, in today's arid Namaqualand. Their associated dates (Table 2) suggest an infiltration much earlier than the introduction of livestock: in fact they may represent remnant backed-rich communities from the Mid-Holocene Altithermal (8000–4000 years ago) in Namaqualand [143]. It seems that warmer and drier periods in Namaqualand correlate with a southward shift of the boundary between the northern and southern lithic traditions. The first livestock here arrived with one of these northern advances.

At the interface of phases 1 and 2, in the last centuries BC, livestock simultaneously breached the north-south boundary in two different locations; along the Atlantic seaboard and from the Zambezi into the middle reaches of the Limpopo River Basin. In the Namibian Coastal Basin, the stone toolkits from the Brandberg northwards remained backed-rich into phase 2 (Fig 3). Most of the phase 2 stone toolkits around the Erongo Mountains remained as scraper-rich as they were in phase 1. But the boundary between the two traditions became less clear in phase 2 and the earliest ceramic vessels in this area sported decorations not unlike those found in the extreme north of this Basin [18, 101, 103, 104]. The site of Geduld [103] which is on the same latitude as the Brandberg, was backed-rich in phase 1 and remained so in phase 2, but it now contained early evidence for sheep as well as the northern style of ceramics. The site of Leopard's Cave in the Erongo Mountains contains the earliest dated sheep bones in southern Africa but its small collection of excavated lithics unfortunately yielded no formal stone tools and only a handful of undiagnostic potsherds [5].

Further south, in the relatively warm period at the dawn of phase 2, few dated sites are known from Namaqualand but at the site of Spoegrivier Cave the phase 1 scraper-rich assemblage was replaced with a backed-rich one, accompanied with sheep bones and ceramic vessels [128]. One of the Spoegrivier sheep bones produced the second oldest secure date for livestock in southern Africa [8]. A few other phase 2 site components in the Western Coastal Basin such as Kasteelberg C [123], Bakoond [144], Reception Shelter [145] and Buzz Shelter [125] contain a backed-rich lithic assemblage, but except for Kasteelberg C they all yielded too small a sample of formal tools to be included on our maps. They nevertheless help confirm the idea of an infiltration by small groups bringing with them the northern lithic tradition. A good indication of the scale of this infiltration is provided by the fact that from over a hundred phase 2 sites recorded in the Western Coastal Basin during excavations and large scale archaeological surveys [121, 125, 146, 147], only a handful contain a formal tool assemblage wherein backed pieces are more numerous than scrapers. The large majority include the same scraper-rich toolkit as in phase 1.

Die Kelders Cave [116] at the west end of the Southern Coastal Basin is the farthest south that we can trace the infiltration of backed-rich toolkits. This site was not occupied in phase 1, but its early phase 2 occupation contains a backed-rich toolkit and sheep bones as well as an excellent collection of thin-walled black, highly burnished, mineral tempered pots. About 150 km further east in the Southern Coastal Basin, the site of Blombos produced another of the earliest sheep remains [4], but its small excavated LSA lithic collection contains only eight formal tools, none of which are scrapers or backed tools [148].

Ceramic vessels probably first reached the sites in the Western and Southern Coastal Basins along with the earliest sheep, from the Namibian Coastal Basin: The very early, perhaps locally invented fibre-tempered pottery typical of phase 2 in the Orange River Basin [49, 149] is all but absent on western and southern coastal sites. In the Western and Southern Coastal Basins, the innovation of pottery seems to have diffused more rapidly than the idea of herding because we find mineral-tempered potsherds on many of the scraper-rich phase 2 sites, but very few have yielded sheep bones that are clearly older than the mid-first millennium AD. The mid-first millennium AD increase in livestock in Western Coastal Basin sites such as at Kasteelberg A and B [123] relates to a separate infiltration (or demic diffusion?) event that originated in the Limpopo River Basin and which will be described in a future publication.

On the other front, the first sheep probably arrived in the Limpopo River Basin with a smaller scale infiltration of herders from adjacent areas in the Zambezi River Basin. We have already seen that a backed-rich toolkit appeared at Bambata Cave in the last few centuries BC. In the first few centuries AD, Bambata Cave and Tuli Lodge both show a backed-rich toolkit. The former includes sheep bones which unfortunately remain undated. Both sites contain a

type of thin-walled mineral tempered pottery known as Bambata ware. Bambata ware diffused throughout the upper Limpopo River Basin among local scraper-rich communities of LSA hunter-gatherers and isolated sherds of Bambata pots are found as far as Manyana in south-eastern Botswana and Jubilee Cave near Pretoria [150, 151]. In the Limpopo River Basin, livestock seem to have been adopted by local communities because early in phase 2 some of them moved westwards into the Kalahari Drainage Basin, taking their scraper-rich toolkit plus Bambata pottery and livestock via the Makgadikgadi Pans and the Boteti River valley as far as Lake Ngami at the southern tip of the Okavango Delta. Bambata pottery is found at several LSA sites along this route [152, 153] but unfortunately none have had their lithic finds published in detail. Only from the well-dated site of Toteng 1 near Lake Ngami [91] do we have quantified information about the stone tools. In phase 1, Toteng contained a northern backed-rich toolkit typical of the Kalahari Drainage Basin LSA sites. With the arrival of livestock at this site, Bambata pottery and a scraper-rich toolkit also appeared. The early phase 2 sites further north and west from Toteng, such as those in the Tsodilo Hills and near the Dobe waterhole [90, 138–142], contain neither livestock nor Bambata pottery, and their toolkits remained backed-rich into phase 2. These bits of evidence indicate that the livestock and Bambata ware at Toteng did not come from the north and west but from the east, brought by hunter-herders from the Limpopo River Basin.

Considering the sub-continental scale, our data points for this study are few but we can use them as a basis for interpolating the distributions of scraper-rich and backed-rich toolkits in sub-equatorial Africa over the period of interest. Using QGIS software (version 2.8.2) and its standard plug-ins [154], a routine inverse distance weighting interpolation of the data was carried out. The study area was gridded in 27 columns and 25 rows and the interpolation was run with a distance coefficient of  $p = 2$ . This produced the maps shown in Fig 4. The interpolated maps in the right hand column show the northern concentration of backed-rich toolkits: in phase 2 (top row) isolated enclaves of backed-rich toolkits reached the south coast. Importantly however, backed-rich enclaves were also present in the south in the first phase suggesting that small scale movements of populations in this landscape were not a unique anomaly necessarily tied to the spread of livestock. In the left hand column of Fig 4, the interpolated distribution of scraper-rich toolkits shows the predominantly southern concentration of this trait. In phase 2 the scraper-rich toolkits became less prominent in the north and west, while becoming more conspicuous in the Limpopo and Orange River Basins in the north-central portion of South Africa. This may be related to the mid-first millennium AD event that brought stylistic and functional elements of Bambata ware to the south and west coasts. The similarity in the extent of this interpolated phase 2 scraper-rich patch in north-central South Africa and the distribution of so-called Khoekhoe (also known as geometric) rock art is [155] worth noting.

## Discussion and Conclusion

In this paper we have seen that the sub-equatorial African Later Stone Age sites of the last two millennia BC, our phase 1, can be divided into a backed-rich tradition in the north and a scraper-rich one in the south. Others had already noted this division [15, 54, 99, 102]. What is new here is that the appearance of the earliest livestock and pottery in southern Africa can be linked to the northern backed-rich tradition on two separate infiltration fronts. On the Atlantic seaboard during the last few centuries BC, one or more small groups of northern backed-rich stone toolkit makers infiltrated livestock and thin-walled mineral tempered ceramic vessels as far as the southern tip of Africa. Farther east, a smaller infiltration of northerners initially introduced livestock and probably Bambata pottery across the Zambezi/Limpopo watershed. From there, Bambata Ware diffused up the Limpopo River basin and some local hunter-gatherers

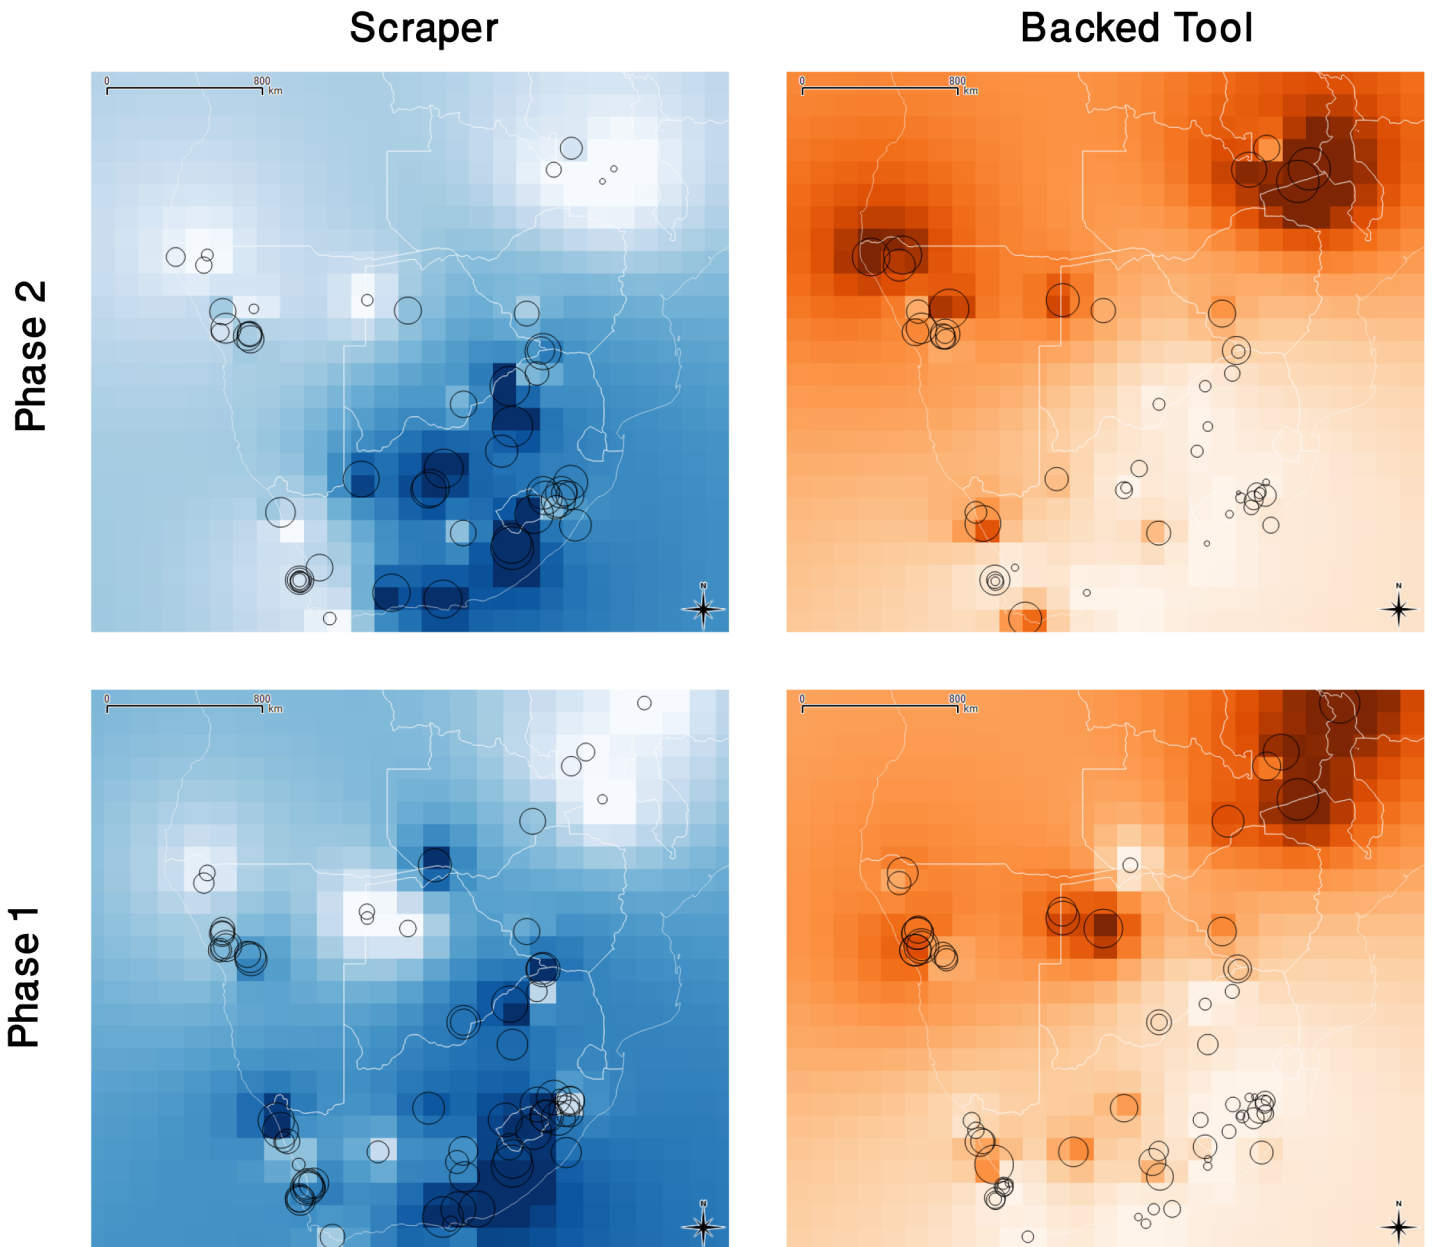

**Fig 4. Inverse Distance Weighted interpolations of scraper and backed tool distributions in phases 1 and 2.** Darker cells indicate higher percentages of the tools in question. In the backgrounds of each image, the site circles from Fig 3 as well as the national boundaries are faintly visible.

doi:10.1371/journal.pone.0134215.g004

with their scraper-rich toolkit adopted livestock and Bambata ware, taking them westwards across the Limpopo/Makgadikgadi watershed and establishing enclaves as far as Lake Ngami, where they replaced the local backed-rich lithic tradition. But to the north and west of Lake Ngami, hunter-gatherers continued to make backed-rich toolkits and adopted neither the Bambata Ware nor livestock herding at this time. Later, in the mid-first millennium AD, Bambata Ware disappeared with the encroachment of the Iron Age way of life, but some of its stylistic and functional traits reappeared on the western and southern coast of South Africa.

These conclusions, based on faunal remains, stone tool types and pottery styles, echo several of the latest findings from genetic studies. Two studies of autosomal DNA diversity in southern

African Khoisan populations divide those in the northwest Kalahari Basin (Ju speakers: !Xun and Ju/'hoansi) from those in the southeast (Tuu and Khoe speakers: Karretjie, ≠Khomani, and Nama), and date this split to the last 30,000 years [156, 157]. This genetic divide matches the split between our northern and southern lithic traditions quite well. However, in other analyses the division of the NW and SE Kalahari groups, based on mtDNA, is not so clear-cut [158]. This difference in clarity of the divide seen in autosomal versus mitochondrial DNA, between the male and the female lineages, perhaps indicates a higher rate of individual frontier mobility among females due to exogamy and patrilocality among the Khoisan.

There is also some genetic evidence to support the linguistic hypothesis [27] that the first herders of southern Africa were Khoe-Kwadi-speakers who originated in East Africa. The distribution of Y chromosome haplogroup E-M293 suggests a movement of people from Tanzania to southern Africa before the Bantu migration [30]. Autosomal data as well as a lactase persistence allele [156, 157] provide evidence of some shared ancestry between the Khoe-speakers, such as the Nama and Shua, with East African populations. But the Nama show much genetic similarity with the southern San groups such as the ≠Khomani and Karretjie and only share a small genetic ancestry with East African groups [157]. This East African component is also present at lower levels in the ≠Khomani and Karretjie, but is extremely rare in the !Xun, the Ju/'hoansi, and the /Gui and //Gana [157]. The scale of admixture suggests that the East African connection was not due to mass population movement, but rather indicates movement of small groups perhaps commensurate with what we have called infiltration. According to Barbieri et al. [158], the presence of mtDNA haplogroups L0d and L0k lineages in the Khoe-speaking populations indicates contact with local San foragers. Admixture of San with the immigrants did not leave evident traces in the maternal genetic material of the local San, which can suggest that the infiltration from East Africa was mainly by male herders. The autosomal and the mtDNA data reveal a highly complex pattern of prehistoric population movements. Like the archaeological evidence, they seem to argue against a single, large-scale migration of a pastoralist population prior to the arrival of the Bantu-speakers.

The diversity of the infiltration events can be gauged to some extent by examining the types of genetic admixture in Khoisan populations. A potential East African genetic candidate is mtDNA haplogroup L5, common in East Africa and present exclusively in the Shua and Tshwa at 5% and 18%, respectively [158]. These two populations currently inhabit the eastern side of the Kalahari Drainage Basin, near the Makgadikgadi Pans and the Boteti River. L5 is notably absent in the Okavango and Nama populations who are today found, respectively, around the Okavango Delta and in central and southern Namibia. The Nama show the clearest signal of ancestry with East Africa in their autosomal (male lineage) data [156, 157]. This mixture of genetic signals could indicate that the Shua and Tshwa may have acquired L5 from females crossing the frontier individually into the eastern parts of the Kalahari Basin, while the Nama on the western edge of the Kalahari Basin may have been infiltrated directly by the East African males. Although the chronology of these events is not precisely indicated in the genetic data, they do not in general contradict the idea that livestock and ceramic vessels may have reached the Limpopo River Basin mainly through a process of individual frontier mobility and that the foragers in the western coastal areas received sheep and pottery mainly in a process of infiltration by northerners. But, it is also possible that high levels of contact with local foragers in the maternal line erased any original signal of East African maternal ancestry in the Nama [158].

The scale of the infiltrations can perhaps be gauged by examining the proportions of genetic admixture in Khoisan populations. To provide a basis for comparison, it is worth noting that the Bantu migrations, which are clearly evident in the archaeological record are also strongly recorded in the genetic data. In south-western Angola, among some of the most admixed Bantu-speaking populations of southern Africa, the patterns of lineage sharing and admixture

estimates suggest that around 75% of mtDNA variation can be traced back to West-Central Africa, which indicates a significant population migration and not a minor infiltration [39]. In general, the maternal genepool of the Bantu-speaking populations of southern Africa is very homogenous [37], again indicating that a coherent and large population was involved in the migration that brought them into southern Africa.

In contrast, the diversity of the mtDNA and autosomal genepool among the Khoe-speakers indicates a much more complex series of small-scale population movements, perhaps of the scale that we have classified in the archaeological record as infiltrations and individual frontier mobility. Of the different East African genetic components, for example, the Afro-Asiatic component is largest in the Nama where it only reaches 11%; and the East African ancestry does not exceed 6% in the other southern African Khoisan groups [29]. The Nama were found to have high levels of the -14010°C Lactose Persistence allele. This allele occurs in 15 of the Khoisan populations and four of the Bantu-speaking groups, at an overall frequency of 7.4% [159]. It was first reported in Kenya and Tanzania at overall frequencies of 28% and 32%, respectively, but is rare or absent in other populations. The -14010°C allele occurs at significantly higher frequency in the Khoe-speakers (11.3%) than in Tuu-speakers (2.4%), Kx'a-speakers (4.1%), or Bantu-speakers (3.9%). These results suggest that the -14010°C allele was brought to southern Africa from East Africa by herders who either interacted predominantly with Khoe speakers or perhaps even spoke languages which were ancestors of the Khoe languages [159]. But the proportion of East African input into the genetic composition of southern African Khoisan remains relatively low and is not evenly distributed among all Khoe-speakers: The genetic data suggest that the Nama originate from a southern San group with some introgression from an East African group [157]. There is also west Eurasian ancestry among the Khoisan some of which came via East Africa; the highest levels of this are found in the Nama, where it reaches 14% but that also includes the impact of recent colonialism [160]. As an extreme example, the input of E-M293 haplotypes from East Africa could have been achieved by as few as four male individuals [30]. All this favours the model of multiple, separate small infiltration events rather than a coherent large-scale population migration as the motor for the introduction of East African traits into southern Africa.

The chronology of all these genetic contributions is relatively imprecise. Estimates based on shared E-M293 haplotypes indicate that gene flow between eastern and southern African populations most likely occurred between 1200 and 2700 years ago (standard error bounded by 40–5000 years ago [30]). The admixture event which introduced Eurasian genetic traits, and which had the largest demographic impact in Khoisan populations that speak Khoe–Kwadi languages, can be dated to ~900–1800 years ago [160]. And the analyses of the LCT region and genome-wide data among southern Africans show that the pastoralist Khoe originate from a San group that adopted pastoralism, with introgression from an East African Afro-Asiatic group that migrated south prior to 1300 years ago [29]. Using the Maasai and Ju|'hoansi as potential parental populations to the Nama, an admixture date of  $1143 \pm 74$  years is indicated. Using the Afar, Amhara, and Tigray instead of Maasai, the admixture dates would be somewhat older around 1255 years ago [29]. It is interesting to note the diversity of these chronological estimates, and that many are too recent to correspond to the earliest infiltrations of livestock into southern Africa. All this suggests that many separate infiltration events brought East African cultural, economic and genetic traits into southern Africa over a long time span. With the help of large scale patterns in the distribution of stone toolkits, ceramics and faunal remains, we have been able to isolate two of the events which infiltrated the first livestock into southern Africa.

## Acknowledgments

This paper is based on a series of my presentations at the ‘Speaking (of) Khoisan’ workshop, held at the Max Plank Institute, Leipzig, in May 2015. The insightful discussions and presentations by all participants in the Khoisan workshop greatly helped to clarify my ideas, but all errors in this paper remain my responsibility. The generosity of Ralf Vogelsang in providing unpublished data on stone tools from north-western Namibia is gratefully acknowledged.

## Author Contributions

Conceived and designed the experiments: KS. Performed the experiments: KS. Analyzed the data: KS. Contributed reagents/materials/analysis tools: KS. Wrote the paper: KS.

## References

1. Cooke CK. Evidence of human migrations from the rock art of southern Rhodesia. *Africa*. 1965; 35: 263–85.
2. Elphick R. *Khoikhoi and the Founding of White South Africa*. Johannesburg: Ravan Press; 1985.
3. Stow GW. *The native races of South Africa*. London: Swan Sonnenschein; 1905.
4. Henshilwood C. A revised chronology for pastoralism in southernmost Africa: new evidence of sheep at c. 2000 b.p. from Blombos Cave, South Africa. *Antiquity*. 1996; 70: 945–9.
5. Pleurdeau D, Imalwa E, Déroit F, Lesur J, Veldman A, Bahain J-J, et al. “Of Sheep and Men”: earliest direct evidence of caprine domestication in Southern Africa at Leopard Cave (Erongo, Namibia). *Plos One* 2012; 7(7): e40340. doi: [10.1371/journal.pone.0040340](https://doi.org/10.1371/journal.pone.0040340) PMID: [22808138](https://pubmed.ncbi.nlm.nih.gov/22808138/)
6. Robbins LH, Campbell AC, Murphy ML, Brook GA, Srivastava P, Badenhorst S. The advent of herding in southern Africa: early AMS dates on domestic livestock from the Kalahari Desert. *Curr Anthropol*. 2005; 46: 671–7.
7. Sealy J, Yates R. The chronology of the introduction of pastoralism to the Cape, South Africa. *Antiquity*. 1994; 68: 58–67.
8. Webley L. Early evidence for sheep from Spoegrivier cave, Namaqualand. *S Afr Fld Archaeol*. 1992; 1: 3–13.
9. Bousman CB. The chronological evidence for the introduction of domestic stock into southern Africa. *Afr Archaeol Rev*. 1998; 15(2): 133–50.
10. Elphick R. *Kraal and castle*. New Haven, CT: Yale University Press; 1977.
11. Russell TM. *The spatial analysis of radiocarbon databases: the spread of the first farmers in Europe and of the fat-tailed sheep in southern Africa*. Oxford: Archaeopress; 2004.
12. Smith AB. On becoming herders: Khoikhoi and San ethnicity in southern Africa. *Afr Stud*. 1990; 49: 51–73.
13. Smith AB. Pastoral origins at the Cape, South Africa: influences and arguments. *South Afr Humanit*. 2008; 20: 49–60.
14. Smith AB. *The origins of herding in southern Africa: debating the ‘Neolithic’ model*. Saarbrücken: Lambert Academic Publishing; 2014.
15. Deacon J. Later Stone Age people and their descendants in southern Africa. In: Klein RG, editor. *Southern African prehistory and palaeoenvironments*. Rotterdam and Boston: A.A.Balkema; 1984. pp. 221–329.
16. Jerardino A, Fort J, Isern N, Rondelli B. Cultural diffusion was the main driving mechanism of the Neolithic transition in southern Africa. *Plos One*. 2014; 9(12): e113672. doi: [10.1371/journal.pone.0113672](https://doi.org/10.1371/journal.pone.0113672) PMID: [25517968](https://pubmed.ncbi.nlm.nih.gov/25517968/)
17. Kinahan J. Alternative views on the acquisition of livestock by hunter-gatherers in southern Africa. *S Afr Archaeol Bull*. 1996; 51: 106–8.
18. Kinahan J. *Pastoral nomads of the Namib Desert: the people history forgot*. 2nd ed. Windhoek: Namibia Archaeological Trust; 2001.
19. Klein RG. The prehistory of Stone Age herders in the Cape Province of South Africa. *S Afr Archaeol Soc Goodw Ser*. 1986; 5: 5–12.
20. Sadr K. The first herders at the Cape of Good Hope. *Afr Archaeol Rev*. 1998; 15: 101–32.
21. Sadr K. The Neolithic of southern Africa. *J Afr Hist*. 2003; 44: 195–209.



22. Fauvelle-Aymar F-X. Against the 'Khoisan paradigm' in the interpretation of Khoekhoe origins and history: re-evaluation of Khoekhoe pastoral traditions. *South Afr Humanit.* 2008; 20: 77–92.
23. Sadr K. Invisible herders? The archaeology of Khoekhoe pastoralists. *South Afr Humanit.* 2008; 20: 179–203.
24. Sadr K. The archaeology of herding in southernmost Africa. In: Mitchell P, Lane P, editors. *The Oxford handbook of African archaeology.* Oxford: Oxford University Press; 2013. pp. 641–51.
25. Ehret C. The first spread of food production to southern Africa. In: Ehret C, Posnansky M, editors. *The archaeological and linguistic reconstruction of African history.* Berkeley: University of California Press; 1982. pp. 158–81.
26. Ehret C. The early livestock raisers of southern Africa. *South Afr Humanit.* 2008; 20(1): 7–35.
27. Güldemann T. A linguist's view: Khoe-Kwadi speakers as the earliest food-producers of southern Africa. *South Afr Humanit.* 2008; 20: 93–132.
28. Westphal EOJ. The linguistic prehistory of southern Africa: Bush, Kwadi, Hottentot, and Bantu linguistic relationships. *Africa* 1963; 33: 237–64.
29. Breton G, Schlebusch CM, Lombard M, Sjödin P, Soodyall H, Jakobsson M. Lactase persistence alleles reveal partial East African ancestry of southern African Khoe pastoralists. *Curr Biol.* 2014; 24: 852–58. doi: [10.1016/j.cub.2014.02.041](https://doi.org/10.1016/j.cub.2014.02.041) PMID: [24704072](https://pubmed.ncbi.nlm.nih.gov/24704072/)
30. Henn BM, Gignoux C, Lin AA, Oefner PJ, Shen P, Scozzari R, et al. Y-chromosomal evidence of a pastoralist migration through Tanzania to southern Africa. *Proc Natl Acad Sci USA.* 2008; 105: 10693–98. doi: [10.1073/pnas.0801184105](https://doi.org/10.1073/pnas.0801184105) PMID: [18678889](https://pubmed.ncbi.nlm.nih.gov/18678889/)
31. Bronk Ramsey C. Bayesian analysis of radiocarbon dates. *Radiocarbon.* 2009; 51: 337–60.
32. McCormac FG, Hogg AG, Blackwell PG, Buck CE, Higham TFG, Reimer PJ. SHCal04 Southern Hemisphere Calibration 0–11.0 cal Kyr BP. *Radiocarbon.* 2004; 46: 1087–92.
33. Delre SA, Jager W, Bijmolt TH, Janssen MA. Will it spread or not? The effects of social influences and network topology on innovation diffusion. *J Prod Innovat Manag.* 2010; 27: 267–82.
34. Katz E, Levin ML, Hamilton H. Traditions of research on the diffusion of innovation. *Am Sociol Rev.* 1963; 28: 237–252.
35. Rogers EM. *Diffusion of innovations.* 5th ed. New York: Free Press; 2003.
36. Zvelebil M, Lillie M. Transition to agriculture in Eastern Europe. In: Price TD, editor. *Europe's first farmers.* Cambridge: Cambridge University Press; 2000. pp. 57–92.
37. Barbieri C, Vicente M, Oliveira S, Bostoen K, Rocha J, Stoneking M, et al. Migration and interaction in a contact zone: mtDNA variation among Bantu-speakers in southern Africa. *Plos One.* 2014; 9(6): e99117. doi: [10.1371/journal.pone.0099117](https://doi.org/10.1371/journal.pone.0099117) PMID: [24901532](https://pubmed.ncbi.nlm.nih.gov/24901532/)
38. Blench R. *Archaeology, language, and the African past.* Lanham: Altamira Press; 2006.
39. Coelho M, Sequeira F, Luiselli D, Beleza S, Rocha J. On the edge of Bantu expansions: mtDNA, Y chromosome and lactase persistence genetic variation in southwestern Angola. *BMC Evol Biol.* 2009; 9: 80. doi: [10.1186/1471-2148-9-80](https://doi.org/10.1186/1471-2148-9-80) PMID: [19383166](https://pubmed.ncbi.nlm.nih.gov/19383166/)
40. Curtin P, Feierman S, Thompson L. *African history: from earliest times to independence.* London: Longman; 1995.
41. Ehret C. *An African classical age: eastern and southern Africa in world history, 1000 B.C. to A.D. 400.* Oxford: James Currey; 1998.
42. Huffman TN. *Iron Age migrations.* Johannesburg: Witwatersrand University Press; 1989.
43. Newman JL. *The peopling of Africa: a geographic interpretation.* New Haven: Yale University Press; 1997.
44. Rexová K, Bastin Y, Frynta D. Cladistic analysis of Bantu languages: a new tree based on combined lexical and grammatical data. *Naturwissenschaften.* 2006; 93(4): 189–194. PMID: [16514514](https://pubmed.ncbi.nlm.nih.gov/16514514/)
45. Cunliffe BW. *Europe between the oceans: 9000 BC to AD 1000.* New Haven: Yale University Press; 2008.
46. Price TD. Lessons in the transition to agriculture. In: Price TD, editor. *Europe's first farmers.* Cambridge: Cambridge University Press; 2000. pp. 301–18.
47. Barnett WK. Cardial pottery and the agricultural transition in Mediterranean Europe. In: Price TD, editor. *Europe's first farmers.* Cambridge: Cambridge University Press; 2000. pp. 93–116.
48. Wiessner P. *Hxaro: a regional system of reciprocity for reducing risk among the! Kung San.* PhD Dissertation, University of Michigan. 1977.
49. Sadr K, Sampson CG. Through thick and thin: early pottery in southern Africa. *J Afr Archaeol.* 2006; 4: 235–252.

50. Sadr K. An ageless view of first millennium AD southern African ceramics. *J Afr Archaeol*. 2008; 6 (1): 103–30.
51. Miller SF. The Nachikufan industries of the Later Stone Age in Zambia. PhD Dissertation, University of California. 1969.
52. Mitchell P. The archaeology of southern Africa. Cambridge: Cambridge University Press; 2002.
53. Phillipson DW. The later prehistory of eastern and southern Africa. London: Heinemann; 1977.
54. Sampson CG. The Stone Age archaeology of southern Africa. New York: Academic Press; 1974.
55. Lombard M, Wadley L, Deacon J, Wurz S, Parsons I, Mohapi M, et al. South African and Lesotho Stone Age sequence updated. *S Afr Archaeol Bull*. 2012; 67: 123–44.
56. Deacon HJ, Deacon J. The hafting, function and distribution of small convex scrapers with an example from Boomplaas Cave. *S Afr Archaeol Bull*. 1980; 35: 31–37.
57. Law-de-Lauriston PBM. The effects of contact with farmers on hunter-gatherers' lithic assemblages: use-wear analysis of stone tools from Holkrans, North West Province, South Africa. PhD Dissertation, University of the Witwatersrand. 2014.
58. Wadley L, Langejans G. Preliminary study of scrapers around combustion features in layer SS, Sibudu, 58 000 years ago. *S Afr Archaeol Bull*. 2014; 69: 19–33.
59. Deacon J. The Later Stone Age of southernmost Africa. Oxford: British Archaeological Reports; 1984.
60. Robertson G, Attenbrow V, Hiscock P. Multiple uses for Australian backed artefacts. *Antiquity*. 2009; 83: 296–308.
61. Lombard M. A method for identifying Stone Age hunting tools. *S Afr Archaeol Bull*. 2005; 60: 115–20.
62. White JP, Thomas DH. What mean these stones? Ethno-taxonomic models and archaeological interpretations in the New Guinea highlands. In: Clarke DL, editor. *Models in archaeology*. London: Methuen & Co; 1972. pp. 275–309.
63. Mazel A, Parkington J. Stone tools and resources: a case study from southern Africa. *World Archaeol*. 1981; 13: 16–30.
64. David B, Lourandos H. Rock art and socio-demography in northeastern Australian prehistory. *World Archaeol*. 1998; 3: 193–219.
65. Deacon HJ. Southern Africa and modern human origins. *Philos T Roy Soc B*. 1992; 337: 177–83.
66. Mazel AD. People making history: the last ten thousand years of hunter-gatherer communities in the Thukela Basin. *Natal Mus J Humanit*. 1989; 1: 1–168.
67. Wurz S. The Howiesons Poort backed artefacts from Klasies River: an argument for symbolic behaviour. *S Afr Archaeol Bull*. 1999; 54: 38–50.
68. Attenbrow V, Robertson G, Hiscock P. 2009. The changing abundance of backed artefacts in south-eastern Australia: a response to Holocene climate change? *J Archaeol Sci*. 2009; 36: 2765–70.
69. Bousman CB. Coping with risk: Later Stone Age technological strategies at Blydefontein Rock Shelter, South Africa. *J Anthropol Archaeol*. 2005; 24(3): 193–226.
70. Clarkson C. Lithics in the land of the lightning brothers: the archaeology of Wardaman Country, Northern Territory. Canberra: ANU E Press; 2007.
71. Hiscock P. Pattern and context in the Holocene proliferation of backed artifacts in Australia. *Arch P Amer Ant Asso*. 2002; 12: 163–77.
72. Bowdler S. Hunters in the highlands: Aboriginal adaptations in the eastern Australian uplands. *Archaeol Ocean*. 1981; 16(2): 99–111.
73. Evans N, Jones R. The cradle of the Pama-Nyungans: archaeological and linguistic speculations. In: Evans N, McConvell P, editors. *Linguistics and archaeology: aboriginal Australia in global perspective*. Oxford: Oxford University Press; 1997. pp. 385–417.
74. McConvell P. Backtracking to Babel: the chronology of Pama-Nyungan expansion in Australia. *Archaeol Ocean*. 1996; 31: 125–44.
75. Opperman H. The Later Stone Age of the Drakensberg Range and its foothills. Oxford: British Archaeological Reports; 1987.
76. Cable C. Economy and technology in the Late Stone Age of southern Natal. Oxford: British Archaeological Reports; 1984.
77. Mazel AD. Diamond 1 and Clarke's Shelter: report on excavations in the northern Drakensberg, Natal, South Africa. *Ann Natal Mus*. 1984; 26: 25–70.
78. Mazel AD. Collingham Shelter: the excavation of late Holocene deposits, Natal, South Africa. *Natal Mus J Humanit*. 1992; 4: 1–51.

79. Maggs T, Ward V. Driel Shelter: rescue at a Late Stone Age site on the Tugela River. *Ann Natal Mus.* 1980; 24: 35–70.
80. Mazel AD. Gehle Shelter: report on excavations in the uplands ecological zone, Tugela Basin, Natal, South Africa. *South Afr Humanit.* 1984; 26: 1–24.
81. Mazel AD. iNkolimahashi Shelter: the excavation of Later Stone Age rock shelter deposits in the central Thukela Basin, KwaZulu-Natal, South Africa. *Natal Mus J Humanit.* 1999; 11: 1–21.
82. Mazel AD. KwaThwaleyakhe Shelter: the excavation of mid and late Holocene deposits in the central Thukela Basin, Natal, South Africa. *Natal Mus J Humanit.* 1993; 5: 1–36.
83. Mazel AD. Maqonqo Shelter: the Excavation of Holocene Deposits in the Eastern Biggarsberg, Thukela Basin, South Africa. *South Afr Humanit.* 1996; 8: 1–39.
84. Mazel AD. Mbabane Shelter and eSinhlonhlweni Shelter: the last two thousand years of hunter-gatherer settlement in the central Thukela Basin, Natal, South Africa. *Ann Natal Mus.* 1986; 27: 389–453.
85. Mazel AD. Mgede Shelter: a mid-and late Holocene observation in the western Biggarsberg, Thukela Basin, Natal, South Africa. *South Afr Humanit.* 1986; 27: 357–87.
86. Mazel AD. Mhlwazini Cave: the excavation of Late Holocene deposits in the northern Natal Drakensberg, Natal, South Africa. *Natal Mus J Humanit.* 1990; 2: 95–133.
87. Mazel AD. Mzinyashana Shelters 1 and 2: excavation of mid and late Holocene deposits in the eastern Biggarsberg, Thukela Basin, South Africa. *South Afr Humanit.* 1997; 9: 1–35.
88. Mazel AD. Nkupe Shelter: report on excavations in the eastern Biggarsberg, Thukela Basin, Natal, South Africa. *Ann Natal Mus.* 1988. 2: 321–77.
89. Mazel AD. Sikhanyisweni Shelter: report on excavations in the Thukela Basin, Natal, South Africa. *Ann Natal Mus.* 1988; 29: 379–406.
90. Yellen JE, Brooks AS. The Late Stone Age archaeology of the! Kangwa and/Xai/Xai Valleys, Ngami-land. *Botswana Notes and Records.* 1989; 20: 5–27.
91. Campbell AC. Southern Okavango integrated water development study. Archaeological survey of the proposed Maun reservoir. Gaborone: Department of Water Affairs; 1992.
92. Van Doornum B. Sheltered from change: hunter-gatherer occupation of Balerno Main Shelter, Shashe-Limpopo confluence area, South Africa. *South Afr Humanit.* 2008; 20: 249–84.
93. Walker N. The significance of an early date for pottery and sheep in Zimbabwe. *S Afr Archaeol Bull.* 1983; 38: 88–92.
94. Walker N. Late Pleistocene and Holocene hunter-gatherers of the Matopos: an archaeological study of change and continuity in Zimbabwe. Uppsala: Societas Archaeologica Upsaliensis; 1995.
95. Wadley L. Later Stone Age hunters and gatherers of the southern Transvaal. Oxford: British Archaeological Reports; 1987.
96. Van der Ryst M. Seeking shelter: Later Stone Age hunters, gatherers and fishers of Olieboomspoor in the western Waterberg, south of the Limpopo. PhD Dissertation, University of the Witwatersrand. 2006.
97. Robbins LH. Recent archaeological research in southeastern Botswana: the Thamaga site. *Botswana Notes and Records.* 1986; 18: 1–13.
98. Van Doornum B. Tshisiku Shelter and the Shashe-Limpopo Confluence Area hunter-gatherer sequence. *South Afr Humanit.* 2007; 19: 17–67.
99. Walker N. The Late Stone Age of Botswana: some recent excavations. *Botswana Notes and Records.* 1994; 26: 1–35.
100. Forssman T. The spaces between places: a landscape study of foragers on the greater Mapungubwe landscape, southern Africa. PhD Dissertation, University of Oxford. 2013.
101. Richter J. Studien zur Urgeschichte Namibias. Köln: Heinrich-Barth-Institut; 1991.
102. Wadley L. Big Elephant shelter and its role in the Holocene prehistory of central South West Africa. *Cimbebasia B.* 1979; 3: 1–76.
103. Smith AB, Jacobson L. Excavations at Geduld and the appearance of early domestic stock in Namibia. *S Afr Archaeol Bull.* 1995; 50: 3–14.
104. Vogelsang R, Eichhorn B. Under the mopane tree: Holocene settlement in northern Namibia. Köln: Heinrich Barth Institut; 2011.
105. Parsons I. Later Stone Age open-air sites on Bloubos, Northern Cape. *S Afr Fld Archaeol.* 2000; 9: 55–67.
106. Sampson CG. The Smithfield industrial complex: further field results. Bloemfontein: National Museum; 1970.

107. Humphreys AJB, Thackeray AI. Ghaap and Gariiep: Later Stone Age studies in the northern Cape. Cape Town: South African Archaeological Society; 1983.
108. Parsons I. Five Later Stone Age artefact assemblages from the interior Northern Cape province. *S Afr Archaeol Bull.* 2008; 63: 51–60.
109. Mitchell P. The flaked stone artefact assemblages from Likoaeng: a late Holocene sequence in the Lesotho highlands and its regional context. *South Afr Humanit.* 2009; 21: 117–55.
110. Mitchell PJ, Parkington JE, Yates R. Recent Holocene archaeology in western and southern Lesotho. *S Afr Archaeol Bull.* 1994; 49: 33–52.
111. Sampson G, Sampson M. Riversmead Shelter: excavations and analysis. Bloemfontein: National Museum; 1967.
112. Wadley L. The Wilton and Pre-Ceramic Post-Classic Wilton industries at Rose Cottage Cave and their context in the South African sequence. *S Afr Archaeol Bull.* 2000; 55: 90–106.
113. Mitchell P. Sehonghong: the late Holocene assemblages with pottery. *S Afr Archaeol Bull.* 1996; 51: 17–25.
114. Deacon HJ, Deacon J, Brooker M, Wilson M. The evidence for herding at Boomplaas Cave in the southern Cape, South Africa. *S Afr Archaeol Bull.* 1978; 33: 39–65.
115. Schweitzer FR, Wilson ML. Byneskranskop 1: a late quaternary living site in the southern Cape Province, South Africa. *Ann S Afr Mus.* 1982; 88: 1–203.
116. Schweitzer F. Excavations at Die Kelders, Cape Province, South Africa. *Ann S Afr Mus.* 1979; 78: 102–233.
117. Binneman JNF. Results from a test excavation at the Havens Cave, Cambria, south-eastern Cape. *S Afr Fld Archaeol.* 1997; 6: 93–105.
118. Deacon HJ. Where hunters gathered: a study of Holocene Stone Age people in the eastern Cape. Claremont: South African Archaeological Society; 1976.
119. Binneman JNF. Archaeological research along the south-eastern Cape coast. Part 2—Caves and Shelters: Kabeljous River Shelter 1 and associated stone tool industries. *S Afr Fld Archaeol.* 2007; 13: 49–77.
120. Deacon J. Wilton: an assessment after 50 years. *S Afr Archaeol Bull.* 1972; 27: 10–45.
121. Manhire A. Later Stone Age settlement patterns in the sandveld of the south-western Cape Province. Oxford: British Archaeological Reports; 1987.
122. Manhire A. A report on the excavations at Faraoskop rock shelter in the Graafwater district of the south-western Cape. *S Afr Fld Archaeol.* 1993; 2: 3–23.
123. Smith AB. Excavations at Kasteelberg, and the origins of the Khoekhoen in the Western Cape, South Africa. Oxford: British Archaeological Reports; 2006.
124. Dewar G. The archaeology of the coastal desert of Namaqualand, South Africa: a regional synthesis. Oxford: British Archaeological Reports; 2008.
125. Orton J. Late Holocene archaeology in Namaqualand, South Africa: hunter-gatherers and herders in a semi-arid environment. PhD Dissertation, University of Oxford. 2012.
126. Jerardino A. Excavations at Pancho's Kitchen Midden, Western Cape coast, South Africa: further observations into the megamidden period. *S Afr Archaeol Bull.* 1998; 53: 16–25.
127. Kaplan J. Settlement and subsistence at Renbaan Cave. In: Parkington J, Hall M, editors. *Papers in the prehistory of the western Cape, South Africa.* Oxford: British Archaeological Reports; 1987. pp. 350–76.
128. Webley L. The re-excavation of Spoegrivier Cave on the west coast of South Africa. *Ann East Cape Mus.* 2001; 2: 19–49.
129. Jerardino A, Yates R. Preliminary results from excavations at Steenbokfontein Cave: implications for past and future research. *S Afr Archaeol Bull.* 1996; 51: 7–16.
130. Jerardino A. Changing social landscapes of the western Cape coast of southern Africa over the last 4500 years. PhD Dissertation, University of Cape Town. 1996.
131. Sadr K, Gribble J. The stone artefacts from the Vredenburg Peninsular archaeological survey, west coast of South Africa. *South Afr Humanit.* 2010; 22: 19–88.
132. Smith AB, Sadr K, Gribble J, Yates R. Excavations in the south-western Cape, South Africa, and the archaeological identity of prehistoric hunter-gatherers within the last 2000 years. *S Afr Archaeol Bull.* 1991; 46: 71–91.
133. Miller SF. The 'Late Stone Age' archaeology of the northern Malawi lake plain. In: Leakey RF, Ogot B, editors. *Proceedings of the 8th PanAfrican Congress on Prehistory and Quaternary Studies.* Nairobi: The International Louis Leakey Memorial Institute for African Prehistory; 1980. pp. 235–58.

134. Phillipson L. The Stone Age archaeology of the upper Zambezi Valley. Nairobi: British Institute in Eastern Africa; 1978.
135. Phillipson DW. The prehistory of eastern Zambia. Nairobi: British Institute in East Africa; 1976.
136. Musonda FB. Late Pleistocene and Holocene microlithic industries from the Lunsemfwa basin, Zambia. *S Afr Archaeol Bull.* 1984; 39: 24–36.
137. Phillipson DW. The Prehistoric Sequence at Nakapapula Rockshelter, Zambia. *P Prehist Soc.* 1970; 35: 172–202.
138. Brooks AS, Yellen JE. Archaeological excavations at  $\neq$  gi: a preliminary report on the first two field seasons. *Botswana Notes and Records.* 1977; 9: 21–30.
139. Robbins LH, Campbell AC. The Depression rock shelter site, Tsodilo Hills. *Botswana Notes and Records.* 1989; 20: 1–3.
140. Robbins LH, Murphy ML, Campbell A, Brook GA. Excavations at the Tsodilo Hills Rhino Cave. *Botswana Notes and Records.* 1996; 28: 23–45.
141. Robbins LH, Murphy ML, Brook GA, Ivester AH, Campbell AC, Klein RG, et al. Archaeology, palaeoenvironment, and chronology of the Tsodilo Hills White Paintings rock shelter, northwest Kalahari Desert, Botswana. *J Archaeol Sci.* 2000; 27: 1085–113.
142. Robbins LH, Brook GA, Murphy ML, Campbell AC, Melear N, Downey WS. Late Quaternary archaeological and palaeoenvironmental data from sediments at Rhino Cave, Tsodilo Hills, Botswana. *S Afr Fld Archaeol.* 2000; 9: 17–31.
143. Dewar G, Orton J. Subsistence, settlement and material culture on the central Namaqualand coastline. In: Jerardino A, Malan A, Braun D, editors. *The Archaeology of the West Coast of South Africa.* Oxford: British Archaeological Reports; 2013. pp. 109–23.
144. Orton J. Hunters or herders? Evidence from the cultural assemblages at Bakoond, Western Cape, South Africa. *Before Farm.* 2009; 4: 1–16.
145. Orton J, Klein RG, Mackay A, Schwartz S, Steele TE. Two Holocene rock shelter deposits from the Knersvlakte, southern Namaqualand, South Africa. *South Afr Humanit.* 2011; 23: 109–50.
146. Conard NJ, Kandel AW. The economics and settlement dynamics of the later Holocene inhabitants of near coastal environments in the West Coast National Park (South Africa). In: Wotzka HP, editor. *Grundlegungen. Beiträge zur europäischen und afrikanischen Archäologie für Manfred K. H. Eggert.* Tübingen: Francke; 2006. pp. 329–55.
147. Sadr K. Radiocarbon dates, stone tools and the origins of herding on the west coast of South Africa. Frankfurt: Africa Magna Verlag; 2014.
148. Henshilwood C. Holocene prehistory of the southern Cape, South Africa: excavations at Blombos Cave and the Blombosfontein Nature Reserve. Oxford: Archaeopress; 2008.
149. Sampson CG, Sadr K. On the size and shape of Later Stone Age fibre-tempered vessels from the upper Seacow River valley. *S Afr Fld Archaeol.* 1999; 8: 3–16.
150. Robbins LH. The Manyana rock painting site. *Botswana Notes and Records.* 1985; 17: 1–14.
151. Wadley L. Changes in the social relations of precolonial hunter-gatherers after agropastoralist contact: an example from the Magaliesberg, South Africa. *J Anthropol Archaeol.* 1996; 15: 205–17.
152. Denbow JR. A new look at the later prehistory of the Kalahari. *J Afr Hist.* 1986; 27: 3–28.
153. Huffman TN. The stylistic origin of Bambata and the spread of mixed farming in southern Africa. *South Afr Humanit.* 2005; 17: 57–79.
154. QGIS Development Team. QGIS Geographic Information System. Beaverton, Oregon: Open Source Geospatial Foundation Project; 2015. <http://qgis.osgeo.org>
155. Russell TM. The position of rock art: a consideration of how GIS can contribute to our understanding of the age and authorship of rock art. In: Smith BW, Morris D, Helskog K editors. *Working with rock art: recording, presenting and understanding rock art using indigenous knowledge.* Johannesburg: Wits University Press; 2012. pp. 37–45.
156. Pickrell JK, Patterson N, Barbieri C, Berthold F, Gerlach L, Güldemann T, et al. The genetic prehistory of southern Africa. *Nature Comm.* 2012; 3:1143.
157. Schlebusch CM, Skoglund P, Sjödin P, Gattepaille LM, Hernandez D, Jay F, et al. Genomic variation in seven Khoe-San groups reveals adaptation and complex African history. *Science.* 2012; 338: 374–9. doi: [10.1126/science.1227721](https://doi.org/10.1126/science.1227721) PMID: [22997136](https://pubmed.ncbi.nlm.nih.gov/22997136/)
158. Barbieri C, Güldemann T, Naumann C, Gerlach L, Berthold F, Nakagawa H, et al. 2014. Unravelling the complex maternal history of Southern African Khoisan populations. *Am J Phys Anthropol.* 2014a; 153: 435–48. doi: [10.1002/ajpa.22441](https://doi.org/10.1002/ajpa.22441) PMID: [24323467](https://pubmed.ncbi.nlm.nih.gov/24323467/)

159. Macholdt E, Lede V, Barbieri C, Mpoloka SW, Chen H, Slatkin M, et al. Tracing pastoralist migrations to southern Africa with lactase persistence alleles. *Curr Biol*. 2014; 24: 875–9. doi: [10.1016/j.cub.2014.03.027](https://doi.org/10.1016/j.cub.2014.03.027) PMID: [24704073](https://pubmed.ncbi.nlm.nih.gov/24704073/)
160. Pickrell JK, Patterson N, Loh PR, Lipson M, Berger B, Stoneking M, et al. Ancient west Eurasian ancestry in southern and eastern Africa. *P Natl Acad Sci USA*. 2013; 111(7): 2632–2637.
